# Supplementary material for: Dual-modal fluorescence and light-scattering sensor based on water-soluble carbon dots for silver ions detection
Source: Royal Society of Chemistry journal article supplement (doi:10.1039/c7ay01873h), 2017-01-01
Supplement: c7ay01873h1.pdf [file c7ay01873h1.pdf]

*Electronic Supplementary Information*

**Dual-modal fluorescence and light-scattering sensor based on  
water-soluble carbon dots for silver ions detection**

**Guoliang Liu,<sup>a,b,c</sup> Chenglei Xuan,<sup>b</sup> Da-Qian Feng,<sup>\*a,b,c</sup> Dongliang Hua,<sup>b</sup> Tianhao Liu,<sup>b</sup>  
Gang Qi,<sup>b</sup> and Wei Wang<sup>\*b</sup>**

<sup>a</sup>Jiangsu Key Laboratory of Biochemistry and Biotechnology of Marine Wetland, Yancheng  
Institute of Technology, Yancheng 224051, China.

<sup>b</sup>School of Chemical and Chemical Engineering, Yancheng Institute of Technology, Yancheng  
224051, China. \*E-mail address: dqfeng09@163.com, wangw@ycit.edu.cn. Tel/ Fax: +86-515-  
88298186.

<sup>c</sup>Department of Chemistry and Key Laboratory for Preparation and Application of Ordered  
Structural Materials of Guangdong Province, Shantou University, Guangdong 515063, China.

**Table S1** Comparison of analytical data of the methods for the detection of Ag<sup>+</sup>.

| Method                                          | Linear range<br>(nM) | Detection limit<br>(nM) | References |
|-------------------------------------------------|----------------------|-------------------------|------------|
| Flame atomic absorption spectrometric detection | -                    | 8.24                    | 31         |
| Visual detection                                | 1000-170000          | 1000                    | 32         |
| Colorimetric detection                          | 5000-40000           | 1000                    | 33         |
| ICP-MS <sup>a</sup>                             | 1.85-4630            | 37                      | 34         |
| CdS-based fluorescence detection                | 100-1500             | 68                      | 35         |
| AgNCs-based fluorescence detection              | 50-500               | 10                      | 36         |
| Resonance Rayleigh scattering                   | 167-2333             | 160                     | 37         |
| CDs-based dual-modal fluorescence detection     | 100-265000           | 50                      | This study |
| CDs-based dual-modal LS detection               | 10-4000              | 2                       | This study |

<sup>a</sup> ICP-MS: inductively coupled plasma–mass spectrometry

**References:**

31 M. Ghaedi, A. Shokrollahi, K. Niknam, E. Niknam, A. Najibi and M. Soylak, *J. Hazard. Mater.*, 2009, **168**, 1022–1027.

- 
- 32 B. X. Liu, H. L. Tan and Y. Chen, *Microchim. Acta*, 2013, **180**, 331–339.
- 33 Y. He, Y. Liang and H. Song, *Plasmonics*, 2016, **11**, 587–591.
- 34 Q. B. Lin, B. Li, H. Song and H. J. Wu, *Food Addit. Contam. A*, 2011, **28**, 1123–1128.
- 35 T. Khantaw, C. Boonmee, T. Tuntulani and W. Ngeontae, *Talanta*, 2013, **115**, 849–856.
- 36 J. Lee, J. Park, H. H. Lee, H. Park, H. Kim and W. J. Kim, *Biosens. Bioelectron.*, 2015, **68**, 642–647.
- 37 G. Q. Wen, C. Y. Lin, M. L. Tang, G. S. Liu, A. H. Liang and Z. L. Jiang, *RSC Adv.*, 2013, **3**, 1941–1946.

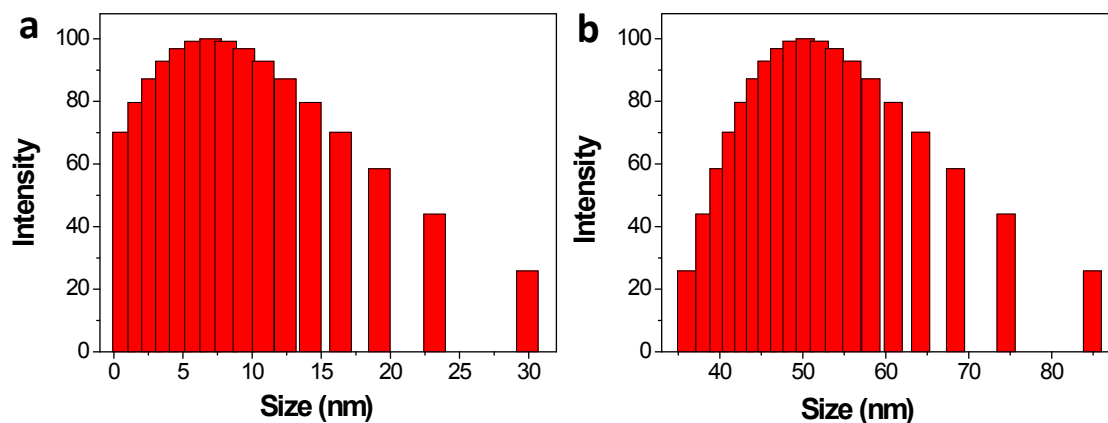

**Figure S1** The present size distributions of prepared CDs (a) or CDs/Cys system reaction with Ag<sup>+</sup> ions (b). Conditions: The concentration of cysteine is 0.5 mM; The concentrations of Ag<sup>+</sup> are 265 μM; BR buffer (pH 7.0).

DLS assays suggest that the hydrated diameter of pre-prepared CDs is 7.0 nm (Fig. S1a). After the addition of cysteine (Cys), the hydrated diameter does not turn up distinct increase. However, upon reacted with Ag<sup>+</sup> ions, the average hydrated diameter of CDs/Cys system appears significant enhancement with approximately 50.3 nm (Fig. S1b). The results of DLS experimental assays are consistent with those of TEM assays.
